# Supplementary material for: A Sensitized RNA Interference Screen Identifies a Novel Role for the PI3K p110γ Isoform in Medulloblastoma Cell Proliferation and Chemoresistance
Source: Oxford University Press journal article supplement (doi:10.1158/1541-7786.mcr-10-0200), 2011-06-08
Supplement: 15417786mcr100200-sup-tab_1.pdf [file 15417786mcr100200-sup-tab_1.pdf]

|                      |                                                                                                                                                                                                                                                                                                                                                 |                                                                                                                                                                                                                                                                                                                                                                                                                                 |                                                                                                                                                                          |
|----------------------|-------------------------------------------------------------------------------------------------------------------------------------------------------------------------------------------------------------------------------------------------------------------------------------------------------------------------------------------------|---------------------------------------------------------------------------------------------------------------------------------------------------------------------------------------------------------------------------------------------------------------------------------------------------------------------------------------------------------------------------------------------------------------------------------|--------------------------------------------------------------------------------------------------------------------------------------------------------------------------|
| Cell line            | DAOY                                                                                                                                                                                                                                                                                                                                            | PFSK                                                                                                                                                                                                                                                                                                                                                                                                                            | UW228                                                                                                                                                                    |
| ATCC Number          | HTB-186                                                                                                                                                                                                                                                                                                                                         | CRL-2060                                                                                                                                                                                                                                                                                                                                                                                                                        |                                                                                                                                                                          |
| Growth properties    | adherent                                                                                                                                                                                                                                                                                                                                        | adherent                                                                                                                                                                                                                                                                                                                                                                                                                        | adherent                                                                                                                                                                 |
| Tumorigenic          | yes                                                                                                                                                                                                                                                                                                                                             | yes                                                                                                                                                                                                                                                                                                                                                                                                                             | yes                                                                                                                                                                      |
| Cytogenetic analysis | hypertetraploid with a modal number between 93 and 99.<br><br>t(1q5q), t(13q;?), 15p+, 7q+, der(9)t(3;9)(p21;q34) and eight others. There are two normal X chromosomes in most cells, but there is no detectable normal Y.                                                                                                                      | hypotetraploid; 84, XXY; -Y, t(Xp;8q), del(1)(p22), -3, del(4)(p14), -9, -10, -13, -14, -14, -16, -22                                                                                                                                                                                                                                                                                                                           | aneuploid<br><br>57XX ; +1, +9, +15, +19, +20 (2 copies), +21                                                                                                            |
| Disease              | desmoplastic cerebellar medulloblastoma                                                                                                                                                                                                                                                                                                         | malignant primitive neuroectodermal tumor                                                                                                                                                                                                                                                                                                                                                                                       | medulloblastoma                                                                                                                                                          |
| Age                  | 4 years                                                                                                                                                                                                                                                                                                                                         | 22 months                                                                                                                                                                                                                                                                                                                                                                                                                       | 9 years                                                                                                                                                                  |
| Gender               | male                                                                                                                                                                                                                                                                                                                                            | male                                                                                                                                                                                                                                                                                                                                                                                                                            | female                                                                                                                                                                   |
| Ethnicity            | Caucasian                                                                                                                                                                                                                                                                                                                                       | Caucasian                                                                                                                                                                                                                                                                                                                                                                                                                       |                                                                                                                                                                          |
| Markers              | Although the original tumor had characteristics of both neuronal and glial differentiation, these were not retained by the cell line. Treatment of the cells with dibutyryl cyclic amp (cAMP) does not induce expression of those characteristics as measured by staining for S100 (S-100) protein and glial fibrillary acidic proteins (GFAP). | PFSK cells form colonies in soft agar, and lack contact inhibition. They express the intermediate filament protein, nestin, and are positive for neuron specific enolase (NSE). They lack characteristics of terminally differentiated neurons or glia. Restriction fragment length polymorphism studies showed loss of heterozygosity for multiple loci on chromosome 17. Neither c-myc nor N-myc is amplified or re-arranged. | UW228 cells form colonies in soft agar. They express intermediate filament protein, vimentin, synaptophysin and lack GFAP and S-100 expression. Further discussed in [1] |
| Reference            | ATCC website                                                                                                                                                                                                                                                                                                                                    | ATCC website                                                                                                                                                                                                                                                                                                                                                                                                                    | [1]                                                                                                                                                                      |

**Supplementary Table S1.** Characteristics of the cell lines under study.

[1] Keles GE, Berger MS, Srinivasan J, Kolstoe DD, Bobola MS, Silber JR. *Oncol Res* 1995;7(10-11):493-503.
